# Supplementary material for: Hypertrophy of the ligamentum flavum in lumbar spinal canal stenosis is associated with abnormal accumulation of specific lipids
Source: PubMed Central journal article supplement (PMC8648848; doi:10.1038/s41598-021-02818-7), 2021-12-06

# Supplemental figure 1

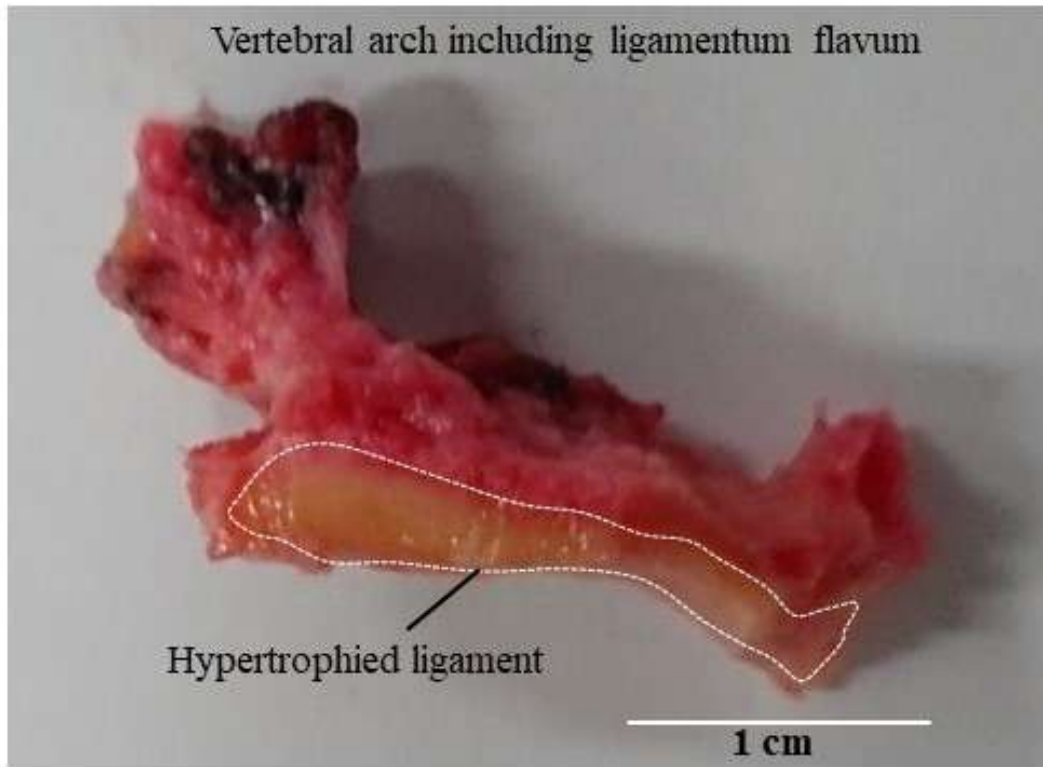

Supplement: 41598_2021_2818_MOESM2_ESM.pdf [file 41598_2021_2818_MOESM2_ESM.pdf]
